# Supplementary material for: Complete Chloroplast Genome Sequences of Two Ehretia Trees (Ehretia cymosa and Ehretia obtusifolia): Genome Structures and Phylogenetic Analysis
Source: MDPI journal article supplement (doi:10.3390/f14071486), 2023-07-20
Supplement: s1 [file s1]

**Table S1.** Gene contents in *E. cymosa* and *E. obtusifolia* chloroplast genomes

| Category             | Gene groups                     | Gene Names                                                                                                                                                                                                                                                                                                                                                                                                                                                                                  |
|----------------------|---------------------------------|---------------------------------------------------------------------------------------------------------------------------------------------------------------------------------------------------------------------------------------------------------------------------------------------------------------------------------------------------------------------------------------------------------------------------------------------------------------------------------------------|
| RNA genes            | Ribosomal RNA genes (rRNA)      | <i>rrn4.5<sup>a</sup>, rrn5<sup>a</sup>, rrn16<sup>a</sup>, rrn23<sup>a</sup></i>                                                                                                                                                                                                                                                                                                                                                                                                           |
|                      | Transfer RNA genes (tRNA)       | <i>trnA-UGC<sup>+,a</sup>, trnC-GCA, trnD-GUC, trnE-UUC, trnF-GAA, trnI<sup>+</sup>-CAU, trnG-GCC, trnG-GCC<sup>+</sup>, trnG-UUC<sup>+</sup>, trnH-GUG, trnI-CAU<sup>+,a</sup>, trnK-UUU<sup>+</sup>, trnL-CAA<sup>a</sup>, trnL-GAU<sup>a</sup>, trnL-UAA<sup>+</sup>, trnL-UAG, trnM-CAU, trnN-GUU<sup>a</sup>, trnP-UGG, trnQ-UUG, trnR-ACG<sup>a</sup>, trnR-UCU, trnS-GCU, trnS-GGA, trnS-UGA, trnT-GGU, trnT-UGU, trnV-GAC<sup>a</sup>, trnV-UAC<sup>+</sup>, trnW-CCA, trnY-GUA</i> |
| Ribosomal proteins   | Small sub-unit of ribosome      | <i>rps2, rps3, rps4, rps7<sup>a</sup>, rps8, rps11, rps12<sup>+,a</sup>, rps14, rps15, rps16<sup>+</sup>, rps18, rps19</i>                                                                                                                                                                                                                                                                                                                                                                  |
| Transcription Genes  | Large sub-unit of ribosome      | <i>rpl2<sup>+,a</sup>, rpl14, rpl16<sup>+</sup>, rpl20, rpl22, rpl23<sup>a</sup>, rpl32, rpl33, rpl36</i>                                                                                                                                                                                                                                                                                                                                                                                   |
|                      | DNA-dependent RNA polymerase    | <i>rpoA, rpoB, rpoC1<sup>+</sup>, rpoC2</i>                                                                                                                                                                                                                                                                                                                                                                                                                                                 |
| Protein-coding genes | Photosystem I                   | <i>psaA, psaB, psaC, psaI, psaJ, ycf3<sup>++</sup></i>                                                                                                                                                                                                                                                                                                                                                                                                                                      |
|                      | Photosystem II                  | <i>psbA, psbB, psbC, psbD, psbE, psbF, psbH, psbI, psbJ, psbK, psbL, psbM, psbN, psbT, psbZ</i>                                                                                                                                                                                                                                                                                                                                                                                             |
|                      | Sub-unit of cytochrome          | <i>petA, petB<sup>+</sup>, petD<sup>+</sup>, petG, petL, petN</i>                                                                                                                                                                                                                                                                                                                                                                                                                           |
|                      | Sub-unit of synthase            | <i>atpA, atpB, atpE, atpF<sup>+</sup>, atpH, atpI</i>                                                                                                                                                                                                                                                                                                                                                                                                                                       |
|                      | Large sub-unit of rubisco       | <i>rbcL</i>                                                                                                                                                                                                                                                                                                                                                                                                                                                                                 |
|                      | NADH dehydrogenase              | <i>ndhA<sup>+</sup>, ndhB<sup>+,a</sup>, ndhC, ndhD, ndhE, ndhF, ndhG, ndhH, ndhI, ndhJ, ndhK</i>                                                                                                                                                                                                                                                                                                                                                                                           |
|                      | ATP-dependent proteasesubunit P | <i>clpP<sup>++</sup></i>                                                                                                                                                                                                                                                                                                                                                                                                                                                                    |
| Other genes          | Cp envelope membrane protein    | <i>cemA</i>                                                                                                                                                                                                                                                                                                                                                                                                                                                                                 |
|                      | Maturase                        | <i>matK</i>                                                                                                                                                                                                                                                                                                                                                                                                                                                                                 |
|                      | Sub-unit acetyl-coA carboxylase | <i>accD</i>                                                                                                                                                                                                                                                                                                                                                                                                                                                                                 |
|                      | C-type cytochrome sythesis      | <i>ccsA</i>                                                                                                                                                                                                                                                                                                                                                                                                                                                                                 |
|                      | Translation initiation factor   | <i>infA</i>                                                                                                                                                                                                                                                                                                                                                                                                                                                                                 |
|                      | Hypothetical proteins           | <i>ycf2<sup>a</sup>, ycf4, ycf15<sup>a</sup></i>                                                                                                                                                                                                                                                                                                                                                                                                                                            |
|                      | Component of TIC complex        | <i>ycf1<sup>a</sup></i>                                                                                                                                                                                                                                                                                                                                                                                                                                                                     |

<sup>+</sup>Gene with one intron, <sup>++</sup>Gene with two introns and <sup>a</sup> Gene with multiple copies. *trnG-UCC* gene was absent in *E. cymosa*, while *trnG-GCC* gene was absent in *E. obtusifolia*.

**Table S2.** Exons and introns lengths in *E. cymosa* and *E. obtusifolia* chloroplast genomes.

| Gene                | Location | Exon I (bp) |             | Intron I (bp) |             | Exon II (bp) |             | Intron II (bp) |             | Exon III (bp) |             |
|---------------------|----------|-------------|-------------|---------------|-------------|--------------|-------------|----------------|-------------|---------------|-------------|
|                     |          | <i>E. c</i> | <i>E. o</i> | <i>E. c</i>   | <i>E. o</i> | <i>E. c</i>  | <i>E. o</i> | <i>E. c</i>    | <i>E. o</i> | <i>E. c</i>   | <i>E. o</i> |
| <i>trnK-UUU</i>     | LSC      | 34          | 34          | 2469          | 2475        | 36           | 36          |                |             |               |             |
| <i>rps16</i>        | LSC      | 226         | 226         | 864           | 864         | 39           | 39          |                |             |               |             |
| <i>trnG-GCC/UCC</i> | LSC      | 22          | 22          | 685           | 685         | 47           | 47          |                |             |               |             |
| <i>atpF</i>         | LSC      | 410         | 410         | 702           | 702         | 143          | 143         |                |             |               |             |
| <i>rpoC1</i>        | LSC      | 1612        | 1610        | 767           | 767         | 450          | 431         |                |             |               |             |
| <i>ycf3</i>         | LSC      | 154         | 154         | 783           | 777         | 227          | 227         | 735            | 733         | 123           | 123         |
| <i>trnL-UAA</i>     | LSC      | 34          | 34          | 496           | 496         | 49           | 49          |                |             |               |             |
| <i>trnV-UAC</i>     | LSC      | 36          | 36          | 582           | 584         | 37           | 35          |                |             |               |             |
| <i>clpP1</i>        | LSC      | 227         | 227         | 613           | 614         | 291          | 291         | 778            | 776         | 70            | 70          |
| <i>petB</i>         | LSC      | 5           | 5           | 778           | 784         | 641          | 641         |                |             |               |             |
| <i>petD</i>         | LSC      | 7           | 7           | 674           | 674         | 474          | 474         |                |             |               |             |
| <i>rpl16</i>        | LSC      | 398         | 398         | 1051          | 1049        | 8            | 8           |                |             |               |             |
| <i>rpl2</i>         | IR       | 433         | 433         | 660           | 660         | 390          | 390         |                |             |               |             |
| <i>ndhB</i>         | IR       | 755         | 757         | 678           | 678         | 776          | 774         |                |             |               |             |
| <i>rps12</i>        | IR       | 25          | 25          | 535           | 535         | 231          | 231         |                |             |               |             |
| <i>trnI-GAU</i>     | IR       | 36          | 36          | 947           | 947         | 34           | 34          |                |             |               |             |
| <i>trnA-UGC</i>     | IR       | 37          | 37          | 806           | 806         | 34           | 34          |                |             |               |             |
| <i>ndhA</i>         | SSC      | 538         | 538         | 1084          | 1086        | 552          | 552         |                |             |               |             |

*trnG-UCC* gene was absent in *E. cymosa*, while *trnG-GCC* gene was absent in *E. obtusifolia*.

**Table S3.** Codon-anticodon recognition patterns and codon usage of the *Ehretia cymosa* chloroplast genome

| Codon  | Amino Acid | RSCU | tRNA     | Codon  | Amino Acid | RSCU | tRNA     |
|--------|------------|------|----------|--------|------------|------|----------|
| UUU(F) | Phe        | 1.2  | trnF-GAA | UAU(Y) | Tyr        | 1.3  | trnY-GUA |
| UUC(F) | Phe        | 0.8  |          | UAC(Y) | Tyr        | 0.7  |          |
| UUA(L) | Leu        | 1.19 | trnL-UAA | UAA(*) | Stop       | 0.99 |          |
| UUG(L) | Leu        | 1.38 | trnL-CAA | UAG(*) | Stop       | 0.94 |          |
| CUU(L) | Leu        | 1.2  | trnL-UAG | CAU(H) | His        | 1.33 | trnH-GUG |
| CUC(L) | Leu        | 0.76 |          | CAC(H) | His        | 0.67 |          |
| CUA(L) | Leu        | 0.85 |          | CAA(Q) | Gln        | 1.3  | trnQ-UUG |
| CUG(L) | Leu        | 0.63 |          | CAG(Q) | Gln        | 0.7  |          |
| AUU(I) | Ile        | 1.27 | trnI-GAU | AAU(N) | Asn        | 1.3  | trnN-GUU |
| AUC(I) | Ile        | 0.85 |          | AAC(N) | Asn        | 0.7  |          |
| AUA(I) | Ile        | 0.88 | trnI-CAU | AAA(K) | Lys        | 1.25 | trnK-UUU |
| AUG(M) | Met        | 1    | trnM-CAU | AAG(K) | Lys        | 0.75 |          |
| GUU(V) | Val        | 1.3  | trnV-GAC | GAU(D) | Asp        | 1.35 | trnD-GUC |
| GUC(V) | Val        | 0.79 |          | GAC(D) | Asp        | 0.65 |          |
| GUA(V) | Val        | 1.07 |          | GAA(E) | Glu        | 1.29 | trnE-UUC |
| GUG(V) | Val        | 0.84 | trnV-UAC | GAG(E) | Glu        | 0.71 |          |
| UCU(S) | Ser        | 1.44 | trnS-GGA | UGU(C) | Cys        | 1.17 | trnC-GCA |
| UCC(S) | Ser        | 0.91 |          | UGC(C) | Cys        | 0.83 |          |
| UCA(S) | Ser        | 1.29 |          | UGA(*) | Stop       | 1.07 |          |
| UCG(S) | Ser        | 0.86 | trnS-UGA | UGG(W) | Trp        | 1    | trnW-CCA |
| CCU(P) | Pro        | 1.06 | trnP-UGG | CGU(R) | Arg        | 0.66 | trnR-ACG |
| CCC(P) | Pro        | 0.87 |          | CGC(R) | Arg        | 0.3  | trnR-UCU |
| CCA(P) | Pro        | 1.13 |          | CGA(R) | Arg        | 1.02 |          |
| CCG(P) | Pro        | 0.94 |          | CGG(R) | Arg        | 0.81 |          |
| ACU(P) | Thr        | 0.96 |          | AGA(R) | Arg        | 1.96 |          |
| ACC(P) | Thr        | 1    |          | AGG(R) | Arg        | 1.25 |          |
| ACA(T) | Thr        | 1.24 | trnT-GGU | AGU(S) | Ser        | 0.8  | trnS-GCU |
| ACG(T) | Thr        | 0.8  | trnT-UGU | AGC(S) | Ser        | 0.7  |          |
| GCU(A) | Ala        | 1.19 | trnA-UGC | GGU(G) | Gly        | 0.91 | trnG-GCC |
| GCC(A) | Ala        | 0.85 |          | GGC(G) | Gly        | 0.61 |          |
| GCA(A) | Ala        | 1.12 |          | GGA(G) | Gly        | 1.29 |          |
| GCG(A) | Ala        | 0.85 |          | GGG(G) | Gly        | 1.19 | trnG-UCC |

**Table S4.** Codon-anticodon recognition patterns and codon usage of the *Ehretia obtusifolia* chloroplast genome

| Codon  | Amino Acid | RSCU | tRNA     | Codon  | Amino Acid | RSCU | tRNA     |
|--------|------------|------|----------|--------|------------|------|----------|
| UUU(F) | Phe        | 1.15 | trnF-GAA | UAU(Y) | Tyr        | 1.35 | trnY-GUA |
| UUC(F) | Phe        | 0.85 |          | UAC(Y) | Tyr        | 0.65 |          |
| UUA(L) | Leu        | 1.23 | trnL-UAA | UAA(*) | Stop       | 0.94 |          |
| UUG(L) | Leu        | 1.34 | trnL-CAA | UAG(*) | Stop       | 1.04 |          |
| CUU(L) | Leu        | 1.09 | trnL-UAG | CAU(H) | His        | 1.28 | trnH-GUG |
| CUC(L) | Leu        | 0.67 |          | CAC(H) | His        | 0.72 |          |
| CUA(L) | Leu        | 0.97 |          | CAA(Q) | Gln        | 1.22 | trnQ-UUG |
| CUG(L) | Leu        | 0.69 |          | CAG(Q) | Gln        | 0.78 |          |
| AUU(I) | Ile        | 1.14 | trnI-GAU | AAU(N) | Asn        | 1.32 | trnN-GUU |
| AUC(I) | Ile        | 0.86 |          | AAC(N) | Asn        | 0.68 |          |
| AUA(I) | Ile        | 1    | trnI-CAU | AAA(K) | Lys        | 1.21 | trnK-UUU |
| AUG(M) | Met        | 1    | trnM-CAU | AAG(K) | Lys        | 0.79 |          |
| GUU(V) | Val        | 1.32 | trnV-GAC | GAU(D) | Asp        | 1.32 | trnD-GUC |
| GUC(V) | Val        | 0.74 |          | GAC(D) | Asp        | 0.68 |          |
| GUA(V) | Val        | 1.12 |          | GAA(E) | Glu        | 1.3  | trnE-UUC |
| GUG(V) | Val        | 0.82 | trnV-UAC | GAG(E) | Glu        | 0.7  |          |
| UCU(S) | Ser        | 1.38 | trnS-GGA | UGU(C) | Cys        | 1.17 | trnC-GCA |
| UCC(S) | Ser        | 0.9  |          | UGC(C) | Cys        | 0.83 |          |
| UCA(S) | Ser        | 1.36 |          | UGA(*) | Stop       | 1.02 |          |
| UCG(S) | Ser        | 0.89 | trnS-UGA | UGG(W) | Trp        | 1    | trnW-CCA |
| CCU(P) | Pro        | 0.96 | trnP-UGG | CGU(R) | Arg        | 0.61 | trnR-ACG |
| CCC(P) | Pro        | 0.86 |          | CGC(R) | Arg        | 0.33 | trnR-UCU |
| CCA(P) | Pro        | 1.22 |          | CGA(R) | Arg        | 0.93 |          |
| CCG(P) | Pro        | 0.96 |          | CGG(R) | Arg        | 0.85 |          |
| ACU(P) | Thr        | 1.1  |          | AGA(R) | Arg        | 2.03 |          |
| ACC(P) | Thr        | 0.83 |          | AGG(R) | Arg        | 1.24 |          |
| ACA(T) | Thr        | 1.22 | trnT-GGU | AGU(S) | Ser        | 0.82 | trnS-GCU |
| ACG(T) | Thr        | 0.85 | trnT-UGU | AGC(S) | Ser        | 0.64 |          |
| GCU(A) | Ala        | 1.24 | trnA-UGC | GGU(G) | Gly        | 0.97 | trnG-GCC |
| GCC(A) | Ala        | 0.8  |          | GGC(G) | Gly        | 0.58 |          |
| GCA(A) | Ala        | 1.08 |          | GGA(G) | Gly        | 1.26 |          |
| GCG(A) | Ala        | 0.88 |          | GGG(G) | Gly        | 1.19 | trnG-UCC |

**Table S5.** Predicted RNA editing site in the *Ehretia cymosa* and *Ehretia obtusifolia* chloroplast genome.

| Gene  | Nucleotide position | Amino acid position | Triplet position within codon | Base conversion | Codon change | Amino acid conversion |
|-------|---------------------|---------------------|-------------------------------|-----------------|--------------|-----------------------|
| matK  | 655                 | 219                 | 1                             | C→U             | CAU→UAU      | H→Y                   |
| atpF  | 92                  | 31                  | 2                             | C→U             | CCA→CUA      | P→L                   |
| rps2  | 248                 | 83                  | 2                             | C→U             | UCA→UUA      | S→L                   |
| rpoB  | 338                 | 113                 | 2                             | C→U             | UCU→UUU      | S→F                   |
|       | 551                 | 184                 | 2                             | C→U             | UCA→UUA      | S→L                   |
|       | 566                 | 189                 | 2                             | C→U             | UCG→UUG      | S→L                   |
|       | 2432                | 811                 | 2                             | C→U             | UCA→UUA      | S→L                   |
| psbZ  | 50                  | 17                  | 2                             | C→U             | UCA→UUA      | S→L                   |
| rps14 | 80                  | 27                  | 2                             | C→U             | UCA→UUA      | S→L                   |
|       | 149                 | 50                  | 2                             | C→U             | CCA→CUA      | P→L                   |
| accD  | 830                 | 277                 | 2                             | C→U             | UCG→UUG      | S→L                   |
| psbE  | 214                 | 72                  | 1                             | C→U             | CCU→UCU      | P→S                   |
| petB  | 611                 | 204                 | 2                             | C→U             | CCA→CUA      | P→L                   |
| rpoA  | 200                 | 67                  | 2                             | C→U             | UCU→UUU      | S→F                   |
| rpl23 | 89                  | 30                  | 2                             | C→U             | UCA→UUA      | S→L                   |
| ndhB  | 53                  | 18                  | 2                             | C→U             | UCA→UUA      | S→L                   |
|       | 59                  | 20                  | 2                             | C→U             | UCA→UUA      | S→L                   |
|       | 95                  | 32                  | 2                             | C→U             | UCA→UUA      | S→L                   |
|       | 149                 | 50                  | 2                             | C→U             | UCA→UUA      | S→L                   |
|       | 467                 | 156                 | 2                             | C→U             | CCA→CUA      | P→L                   |
|       | 586                 | 196                 | 1                             | C→U             | CAU→UAU      | H→Y                   |
|       | 704                 | 235                 | 2                             | C→U             | CCA→CUA      | P→L                   |
|       | 737                 | 246                 | 2                             | C→U             | CCA→CUA      | P→L                   |
|       | 746                 | 249                 | 2                             | C→U             | UCU→UUU      | S→F                   |
| ndhF  | 290                 | 97                  | 2                             | C→U             | UCA→UUA      | S→L                   |
| ndhD  | 2                   | 1                   | 2                             | C→U             | ACG→AUG      | T→M                   |
|       | 383                 | 128                 | 2                             | C→U             | UCA→UUA      | S→L                   |
|       | 674                 | 225                 | 2                             | C→U             | UCG→UUG      | S→L                   |
|       | 878                 | 293                 | 2                             | C→U             | UCA→UUA      | S→L                   |
| ndhG  | 50                  | 17                  | 2                             | C→U             | UCG→UUG      | S→L                   |
| ndhA  | 341                 | 114                 | 2                             | C→U             | UCA→UUA      | S→L                   |

**Table S6.** Repeat sequences present in the *Ehretia cymosa* chloroplast genome.

| SN | Repeat<br>Size | Repeat<br>Position 1 | Repeat<br>Type | Repeat<br>Location 1 | Repeat<br>Position 2 | Repeat<br>Location 2 | E-Value    |
|----|----------------|----------------------|----------------|----------------------|----------------------|----------------------|------------|
| 1  | 44             | 76685                | P              | IGS                  | 76685                | IGS                  | 0 2.22e-17 |
| 2  | 41             | 40237                | F              | psaB                 | 42461                | psaA                 | 0 1.42e-15 |
| 3  | 29             | 8682                 | P              | trnS-GCU             | 46755                | trnS-GGA             | 0 2.38e-08 |
| 4  | 29             | 65460                | P              | IGS                  | 110054               | IGS                  | 0 2.38e-08 |
| 5  | 29             | 65460                | F              | IGS                  | 132819               | IGS                  | 0 2.38e-08 |
| 6  | 26             | 90191                | P              | ycf2                 | 90191                | ycf2                 | 0 1.53e-06 |
| 7  | 26             | 90191                | F              | ycf2                 | 152685               | ycf2                 | 0 1.53e-06 |
| 8  | 26             | 152685               | P              | ycf2                 | 152685               | ycf2                 | 0 1.53e-06 |
| 9  | 24             | 127356               | P              | ycf1                 | 127356               | ycf1                 | 0 2.44e-05 |
| 19 | 22             | 8919                 | P              | IGS                  | 44989                | ycf3 - Intron        | 0 3.91e-04 |
| 11 | 22             | 10255                | F              | trnG-GCC             | 38027                | trnG-GCC             | 0 3.91e-04 |
| 12 | 22             | 32385                | P              | IGS                  | 32385                | IGS                  | 0 3.91e-04 |
| 13 | 22             | 96276                | P              | IGS                  | 96302                | IGS                  | 0 3.91e-04 |
| 14 | 22             | 96276                | F              | IGS                  | 146578               | IGS                  | 0 3.91e-04 |
| 15 | 22             | 96302                | F              | IGS                  | 146604               | IGS                  | 0 3.91e-04 |
| 16 | 22             | 116011               | R              | IGS                  | 116011               | IGS                  | 0 3.91e-04 |
| 17 | 22             | 117844               | P              | IGS                  | 117844               | IGS                  | 0 3.91e-04 |
| 18 | 22             | 146578               | P              | IGS                  | 146604               | IGS                  | 0 3.91e-04 |
| 19 | 21             | 8687                 | F              | trnS-GCU             | 37104                | trnS-UGA             | 0 1.56e-03 |
| 20 | 21             | 37104                | P              | trnS-UGA             | 46758                | trnS-GGA             | 0 1.56e-03 |
| 21 | 21             | 38237                | F              | trnM-CAU             | 69019                | trnP-UGG             | 0 1.56e-03 |
| 22 | 21             | 93831                | F              | ycf2                 | 93849                | ycf2                 | 0 1.56e-03 |
| 23 | 21             | 93831                | P              | ycf2                 | 149032               | ycf2                 | 0 1.56e-03 |
| 24 | 21             | 93849                | P              | ycf2                 | 149050               | ycf2                 | 0 1.56e-03 |
| 25 | 21             | 100862               | F              | IGS                  | 122634               | ndhA - Intron        | 0 1.56e-03 |
| 26 | 21             | 122168               | R              | ndhA                 | 122168               | ndhA                 | 0 1.56e-03 |
| 27 | 21             | 122634               | P              | ndhA - Intron        | 142019               | IGS                  | 0 1.56e-03 |
| 28 | 21             | 149032               | F              | ycf2                 | 149050               | ycf2                 | 0 1.56e-03 |
| 29 | 20             | 51915                | R              | ndhC                 | 51915                | ndhC                 | 0 6.25e-03 |
| 30 | 20             | 53899                | P              | trnV-UAC             | 105576               | trnA-UGC             | 0 6.25e-03 |
| 31 | 20             | 53899                | F              | trnV-UAC             | 137306               | trnA-UGC             | 0 6.25e-03 |
| 32 | 20             | 115985               | F              | IGS                  | 123274               | ndhA - Intron        | 0 6.25e-03 |
| 33 | 19             | 7431                 | R              | IGS                  | 7431                 | IGS                  | 0 2.50e-02 |
| 34 | 19             | 15661                | R              | atpI                 | 15661                | atpI                 | 0 2.50e-02 |
| 35 | 19             | 67949                | F              | IGS                  | 84330                | rpl16                | 0 2.50e-02 |
| 36 | 19             | 68508                | R              | IGS                  | 68508                | IGS                  | 0 2.50e-02 |
| 37 | 19             | 82952                | R              | IGS                  | 82952                | IGS                  | 0 2.50e-02 |
| 38 | 18             | 263                  | P              | IGS                  | 310                  | IGS                  | 0 1.00e-01 |
| 39 | 18             | 4213                 | F              | IGS                  | 71586                | IGS                  | 0 1.00e-01 |
| 40 | 18             | 7240                 | P              | IGS                  | 67949                | IGS                  | 0 1.00e-01 |
| 41 | 18             | 7240                 | P              | IGS                  | 84330                | rpl16 - Intron       | 0 1.00e-01 |
| 42 | 18             | 7241                 | F              | IGS                  | 73944                | clpP1 - Intron       | 0 1.00e-01 |
| 43 | 18             | 8752                 | F              | trnS-GCU             | 37174                | trnS-UGA             | 0 1.00e-01 |
| 44 | 18             | 16935                | P              | IGS                  | 16935                | IGS                  | 0 1.00e-01 |
| 45 | 18             | 25440                | C              | rpoB                 | 29434                | IGS                  | 0 1.00e-01 |
| 46 | 18             | 31414                | C              | IGS                  | 62888                | IGS                  | 0 1.00e-01 |
| 47 | 18             | 33040                | R              | IGS                  | 33040                | IGS                  | 0 1.00e-01 |

**Table S7.** Repeat sequences present in the *Ehretia obtusifolia* chloroplast genome.

| SN | Repeat<br>Size | Repeat<br>Position 1 | Repeat<br>Type | Repeat<br>Location 1 | Repeat<br>Position 2 | Repeat<br>Location 2 | E-Value    |
|----|----------------|----------------------|----------------|----------------------|----------------------|----------------------|------------|
| 1  | 44             | 76319                | P              | IGS                  | 130163               | ycf1                 | 0 2.21e-17 |
| 2  | 41             | 39891                | F              | psaB                 | 76319                | IGS                  | 0 1.41e-15 |
| 3  | 32             | 61289                | P              | IGS                  | 42115                | psaA                 | 0 3.71e-10 |
| 4  | 29             | 8701                 | P              | IGS                  | 61289                | IGS                  | 0 2.37e-08 |
| 5  | 29             | 65149                | P              | IGS                  | 46410                | trnS-GGA             | 0 2.37e-08 |
| 6  | 29             | 65149                | F              | IGS                  | 109682               | IGS                  | 0 2.37e-08 |
| 7  | 26             | 89824                | P              | ycf2                 | 132461               | IGS                  | 0 1.52e-06 |
| 8  | 26             | 89824                | F              | ycf2                 | 89824                | ycf2                 | 0 1.52e-06 |
| 9  | 26             | 152322               | P              | ycf2                 | 152322               | ycf2                 | 0 1.52e-06 |
| 19 | 24             | 115652               | R              | IGS                  | 152322               | ycf2                 | 0 2.43e-05 |
| 11 | 24             | 126998               | P              | ycf1                 | 115652               | IGS                  | 0 2.43e-05 |
| 12 | 22             | 10278                | F              | trnG-UCC             | 126998               | ycf1                 | 0 3.89e-04 |
| 13 | 22             | 14780                | F              | IGS                  | 37679                | trnG-GCC             | 0 3.89e-04 |
| 14 | 22             | 32034                | P              | IGS                  | 14802                | IGS                  | 0 3.89e-04 |
| 15 | 22             | 95911                | P              | IGS                  | 32034                | IGS                  | 0 3.89e-04 |
| 16 | 22             | 95911                | F              | IGS                  | 95937                | IGS                  | 0 3.89e-04 |
| 17 | 22             | 95937                | F              | IGS                  | 146213               | IGS                  | 0 3.89e-04 |
| 18 | 22             | 117485               | P              | IGS                  | 146239               | IGS                  | 0 3.89e-04 |
| 19 | 22             | 146213               | P              | IGS                  | 117485               | IGS                  | 0 3.89e-04 |
| 20 | 21             | 8706                 | F              | trnS-GCU             | 146239               | IGS                  | 0 1.56e-03 |
| 21 | 21             | 36754                | P              | trnS-UGA             | 36754                | trnS-UGA             | 0 1.56e-03 |
| 22 | 21             | 37891                | F              | IGS                  | 46413                | trnS-GGA             | 0 1.56e-03 |
| 23 | 21             | 93464                | F              | ycf2                 | 68676                | trnP-UGG             | 0 1.56e-03 |
| 24 | 21             | 93464                | P              | ycf2                 | 93482                | ycf2                 | 0 1.56e-03 |
| 25 | 21             | 93482                | P              | ycf2                 | 148669               | ycf2                 | 0 1.56e-03 |
| 26 | 21             | 100497               | F              | IGS                  | 148687               | ycf2                 | 0 1.56e-03 |
| 27 | 21             | 121808               | R              | ndhA                 | 122274               | ndhA - Intron        | 0 1.56e-03 |
| 28 | 21             | 122274               | P              | ndhA - Intron        | 121808               | ndhA                 | 0 1.56e-03 |
| 29 | 21             | 148669               | F              | ycf2                 | 141654               | IGS                  | 0 1.56e-03 |
| 30 | 20             | 28435                | F              | IGS                  | 148687               | ycf2                 | 0 6.22e-03 |
| 31 | 20             | 37781                | R              | IGS                  | 28445                | IGS                  | 0 6.22e-03 |
| 32 | 20             | 51578                | R              | ndhC                 | 37781                | IGS                  | 0 6.22e-03 |
| 33 | 20             | 53562                | P              | trnV-UAC             | 51578                | ndhC                 | 0 6.22e-03 |
| 34 | 20             | 53562                | F              | trnV-UAC             | 105204               | trnA-UGC             | 0 6.22e-03 |
| 35 | 20             | 115626               | F              | IGS                  | 136948               | trnA-UGC             | 0 6.22e-03 |
| 36 | 19             | 7449                 | R              | IGS                  | 122916               | ndhA - Intron        | 0 2.49e-02 |
| 37 | 19             | 15726                | R              | atpI                 | 7449                 | IGS                  | 0 2.49e-02 |
| 38 | 18             | 288                  | P              | IGS                  | 15726                | atpI                 | 0 9.96e-02 |
| 39 | 18             | 8771                 | F              | trnS-GCU             | 335                  | IGS                  | 0 9.96e-02 |
| 40 | 18             | 8938                 | P              | IGS                  | 36824                | trnS-UGA             | 0 9.96e-02 |
| 41 | 18             | 10342                | R              | IGS                  | 44642                | ycf3 - Intron        | 0 9.96e-02 |
| 42 | 18             | 25498                | C              | rpoB                 | 10342                | IGS                  | 0 9.96e-02 |
| 43 | 18             | 32689                | R              | IGS                  | 29512                | IGS                  | 0 9.96e-02 |
| 44 | 18             | 58588                | P              | IGS                  | 32689                | IGS                  | 0 9.96e-02 |
| 45 | 18             | 62955                | P              | IGS                  | 83127                | IGS                  | 0 9.96e-02 |
| 46 | 18             | 68167                | R              | IGS                  | 120745               | IGS                  | 0 9.96e-02 |
| 47 | 18             | 68914                | R              | IGS                  | 68167                | IGS                  | 0 9.96e-02 |
| 48 | 18             | 104122               | P              | trnI-GAU             | 68914                | IGS                  | 0 9.96e-02 |
| 49 | 18             | 104122               | F              | trnI-GAU             | 110592               | trnN-GUU             | 0 9.96e-02 |

**Table S8.** Simple sequence repeats in the chloroplast genome of *Ehretia cymosa*

| Repeat | Length (bp) | Number | Start position                                                                                                                                                                                     |
|--------|-------------|--------|----------------------------------------------------------------------------------------------------------------------------------------------------------------------------------------------------|
| A      | 8           | 26     | 7444; 8903; 9016; 9251; 22954; 37344; 37815; 38868; 43793; 48493; 49116; 56243; 61905; 64759; 66204; 66764; 70336; 70845; 73599; 73619; 95830; 113111; 116974; 117926; 119498; 121104              |
|        | 9           | 19     | 4568; 4776; 8662; 14142; 15992; 19288; 38146; 44402; 46227; 65808; 72706; 80271; 92017; 99226; 137933; 141668; 142967; 146877; 156271                                                              |
|        | 10          | 5      | 4217; 30216; 37815; 45971; 71518                                                                                                                                                                   |
|        | 11          | 7      | 4217; 29208; 56825; 56848; 65808; 83491; 115208                                                                                                                                                    |
|        | 12          | 3      | 67955; 84336; 116240                                                                                                                                                                               |
|        | 17          | 1      | 16936                                                                                                                                                                                              |
|        |             |        |                                                                                                                                                                                                    |
| C      | 8           | 1      | 5082                                                                                                                                                                                               |
|        | 12          | 1      | 38146                                                                                                                                                                                              |
| T      | 8           | 28     | 1561; 2177; 8012; 8214; 9016; 17245; 26852; 30866; 43793; 48359; 49116; 50320; 51730; 56701; 62140; 67468; 69317; 70845; 71518; 72968; 76456; 77682; 86557; 117306; 118511; 128279; 130289; 147066 |
|        | 9           | 23     | 16936; 43793; 52477; 53365; 58933; 58984; 86312; 86557; 86632; 96018; 99928; 101227; 104962; 112382; 115208; 117805; 121104; 123027; 125556; 128508; 143669; 150878                                |
|        | 10          | 9      | 9016; 14703; 31557; 56243; 60860; 62788; 80516; 116018; 128882                                                                                                                                     |
|        | 11          | 3      | 33459; 65808; 68513                                                                                                                                                                                |
|        | 12          | 3      | 7242; 61576; 67468                                                                                                                                                                                 |
|        | 13          | 2      | 73944; 82956                                                                                                                                                                                       |
|        | 15          | 1      | 19145                                                                                                                                                                                              |
|        |             |        |                                                                                                                                                                                                    |
| AT     | 5           | 4      | 15177; 20518; 87252; 155642                                                                                                                                                                        |
| TTC    | 4           | 1      | 36754                                                                                                                                                                                              |
| AAAC   | 3           | 1      | 70336                                                                                                                                                                                              |
| TTTA   | 3           | 2      | 10317; 23263                                                                                                                                                                                       |
| TTGGA  | 3           | 1      | 67468                                                                                                                                                                                              |



**Table S9.** Simple sequence repeats in the chloroplast genome of *Ehretia obtusifolia*

| Repeat | Length (bp) | Number | Start position                                                                                                                                                                                                  |
|--------|-------------|--------|-----------------------------------------------------------------------------------------------------------------------------------------------------------------------------------------------------------------|
| A      | 8           | 26     | 7462; 8922; 9040; 9274; 23012; 36994; 37465; 38522; 43447; 45874; 48148; 48771; 55906; 61594; 64448; 65497; 66425; 69995; 70504; 73253; 73273; 95463; 112753; 116615; 117567; 119139                            |
|        | 9           | 19     | 4248; 4599; 4807; 14188; 16057; 19346; 37802; 45874; 65497; 71177; 72359; 79911; 91650; 98861; 137575; 141310; 142602; 155908; 155951                                                                           |
|        | 10          | 8      | 8680; 30298; 45618; 56488; 83128; 83972; 114850; 115883; 8680                                                                                                                                                   |
|        | 11          | 2      | 29286; 146512                                                                                                                                                                                                   |
|        | 12          | 3      | 4248; 37465; 67614                                                                                                                                                                                              |
|        | 13          | 1      | 56488                                                                                                                                                                                                           |
|        |             |        |                                                                                                                                                                                                                 |
| C      | 9           | 1      | 5113                                                                                                                                                                                                            |
|        | 10          | 1      | 37802                                                                                                                                                                                                           |
| T      | 8           | 30     | 1586; 1796; 2208; 8030; 8232; 9040; 17303; 26910; 30948; 43447; 48014; 48771; 49983; 51393; 53028; 53504; 56364; 61829; 67129; 70504; 71177; 76090; 77316; 85946; 86190; 116947; 118152; 127921; 129931; 146703 |
|        | 9           | 18     | 9040; 10457; 52140; 58597; 72621; 86190; 86265; 99563; 100855; 104590; 114850; 117446; 120818; 125198; 128150; 128229; 143304; 150515                                                                           |
|        | 10          | 11     | 43447; 55906; 60526; 62477; 65497; 67129; 68172; 68974; 80156; 82596; 128524                                                                                                                                    |
|        | 11          | 4      | 7261; 58597; 95651; 122667                                                                                                                                                                                      |
|        | 12          | 4      | 17001; 61242; 73598; 115659                                                                                                                                                                                     |
|        | 13          | 1      | 19203                                                                                                                                                                                                           |
|        | 14          | 1      | 33106                                                                                                                                                                                                           |
|        |             |        |                                                                                                                                                                                                                 |
| AT     | 5           | 4      | 15242; 20576; 86885; 155279                                                                                                                                                                                     |
| TTC    | 4           | 1      | 36404                                                                                                                                                                                                           |
| AAAC   | 3           | 1      | 69995                                                                                                                                                                                                           |
| TTTA   | 3           | 2      | 10340; 23321                                                                                                                                                                                                    |
| TTGGA  | 3           | 1      | 67129                                                                                                                                                                                                           |
